# Supplementary material
Source: publisher figshare collection journal article supplement (https://karger.figshare.com/articles/dataset/_/5120392)
Supplement: Supplementary file 1 [file 1]

**Online supplement Table 1.** Effects of NGF on the total histamine contents or amounts of histamine released due to stimulation by calcium ionophore, A23187, in NGF-cultured mast cells<sup>a</sup>.

| Histamine release (ng/1 x 10 <sup>6</sup> cells) |         |                               |             |       |                             |       |                              |                     |
|--------------------------------------------------|---------|-------------------------------|-------------|-------|-----------------------------|-------|------------------------------|---------------------|
| Total                                            |         |                               | A23187 ( M) |       |                             |       |                              |                     |
|                                                  |         |                               | 0.1         |       |                             | 0.5   |                              |                     |
| HMC-1 cells                                      |         |                               |             |       |                             |       |                              |                     |
| (-) NGF                                          | 330.3   | 14.28                         |             | 217.5 | 2.42 (65.8) <sup>c</sup>    | 255.7 | 5.13                         | (77.4) <sup>c</sup> |
| (+) NGF                                          | 458.7   | 6.93 (38.9) <sup>b,**</sup>   |             | 262.7 | 5.12 (57.3) <sup>c,*</sup>  | 348.5 | 17.23 (75.0) <sup>c,**</sup> |                     |
| BMMCs                                            |         |                               |             |       |                             |       |                              |                     |
| (-) NGF                                          | 659.2   | 11.21                         |             | 85.7  | 16.96 (13.0) <sup>c</sup>   | 210.7 | 43.42 (32.0) <sup>c</sup>    |                     |
| (+) NGF                                          | 1,005.7 | 24.73 (52.6) <sup>b,***</sup> |             | 140.8 | 0.50 (14.0) <sup>c,**</sup> | 314.0 | 38.37 (31.2) <sup>c,**</sup> |                     |

<sup>a</sup>HMC-1 cells or BMMCs (1 x 10<sup>6</sup> cells) cultured in NGF (10 ng/ml) for 10 days or for 5 weeks were lysed with 0.4% triton X-100 or stimulated by A23187 (0.1 or 0.3 M) as described in “Materials and Methods”. Histamine was determined using an automated fluorometer. (-) NGF or (+) NGF, cells cultured without or with NGF, respectively.

<sup>b</sup>Parentheses represent percentage increased in NGF-cultured cells, compared to control media. <sup>c</sup>Parentheses represent percentage released by A23187, compared to total contents. Spontaneous histamine release for HMC-1 cells or for BMMCs was 8–12% and 2–5% of total histamine content, respectively. \**P*<0.05; \*\**P*<0.01; \*\*\**P*<0.01 compared with control media.

**Online supplement Table 2.** Effects of NGF on the total content and amounts released of tryptase due to stimulation by calcium ionophore (A23187) in NGF-cultured HMC-1 cells<sup>a</sup>.

|         | Tryptase (ng/1 x 10 <sup>6</sup> cells) |                            |             |                         |     |                           |
|---------|-----------------------------------------|----------------------------|-------------|-------------------------|-----|---------------------------|
|         | Total                                   |                            | A23187 ( M) |                         |     |                           |
|         |                                         |                            | 0.1         |                         | 0.3 |                           |
| (-) NGF | 152                                     | 11.8                       | 15          | 2.1 (9.8) <sup>c</sup>  | 25  | 1.8 (16.4) <sup>c</sup>   |
| (+) NGF | 204                                     | 10.6 (25.5) <sup>b,*</sup> | 21          | 1.5 (10.3) <sup>c</sup> | 33  | 2.6 (16.2) <sup>c,*</sup> |

<sup>a</sup>HMC-1 cells (1 x 10<sup>6</sup> cells) cultured in NGF (10 ng/ml) for 10 days were lysed with 0.4% triton X-100 or stimulated by A23187 (0.1 or 0.3 M) as described in “Materials and Methods”. Tryptase were determined using ELISA. (-) NGF or (+) NGF, cells cultured without or with NGF, respectively. <sup>b</sup>Parentheses represent percentage increased in NGF-cultured cells, compared to control media. <sup>c</sup>Parentheses represent percentage released by A23187, compared to total contents. Spontaneous tryptase release for (-) NGF was 6.5 ± 2.46 ng/1 x 10<sup>6</sup>cells, for (+) NGF was 6.8 ± 3.60 ng/1 x 10<sup>6</sup>cells (N = 6).

\**P*<0.05 compared with (-) NGF.

**Online supplement Table 3.** Total contents and amounts released of histamine and tryptase in NGF-cultured bone marrow-derived mast cells activated with antigen/antibody reaction<sup>a</sup>.

|     |                                        | Histamine (ng/1 × 10 <sup>6</sup> cells) <sup>b</sup> |                                                |  | Tryptase (ng/1 × 10 <sup>6</sup> cells) <sup>c</sup> |                                                |  |
|-----|----------------------------------------|-------------------------------------------------------|------------------------------------------------|--|------------------------------------------------------|------------------------------------------------|--|
|     |                                        | Total                                                 | HSA-DNP/anti-DNP IgE (10ng/0.1 g) <sup>d</sup> |  | Total                                                | HSA-DNP/anti-DNP IgE (10ng/0.1 g) <sup>d</sup> |  |
| (-) | 644.4 18.45                            | 174.3 14.93<br>(27.0) <sup>f</sup>                    |                                                |  | 252.2 25.77                                          | 44.7 ± 1.79<br>(17.7) <sup>f</sup>             |  |
| (+) | 954.7 35.43<br>(48.2) <sup>e,***</sup> | 305.5 22.43<br>(32.0) <sup>f,***</sup>                |                                                |  | 410.9 20.22<br>(62.7) <sup>e,***</sup>               | 80.1 ± 4.06<br>(19.5) <sup>f,***</sup>         |  |

<sup>a</sup>NGF-cultured BMMCs (1 × 10<sup>6</sup> cells) for 5 weeks were stimulated with HSA-DNP/anti-DNP IgE antibody reaction (10 ng/0.1 g). Histamine contents were analyzed using an automated fluorometer, and tryptase by ELISA as described in “Materials and Methods”.

<sup>b</sup>BMMCs cultured with WEHI-3B media. <sup>c</sup>BMMCs cultured with hrIL-3 media. <sup>d</sup>We used various concentrations of antigen and antibody in BMMCs stimulation, but showed only mediator content in single dose of antigen and antibody. <sup>e</sup>Parentheses represent percentage increased in NGF-cultured cells, compared to control. <sup>f</sup>Parentheses represent percentage released by HSA-DNP/anti-DNP IgE, compared with total mediator contents. Spontaneous histamine and tryptase releases for (-) NGF were 32.2 ± 2.43 ng and 5.6 ± 0.66 ng/1 × 10<sup>6</sup> cells; for (+) NGF were 26.1 ± 2.94 ng and 6.5 ± 0.43 ng/1 × 10<sup>6</sup> cells, respectively (N = 6). \*\*\**P*<0.001 compared with (-) NGF. (-) or (+), cells cultured without or with NGF, respectively.

**Online supplement Table 4.** Total amounts of mediators in NGF-cultured bone marrow-derived mast cells in mice<sup>a</sup>.

| Week |         | Histamine <sup>b</sup>         |                             | Tryptase <sup>c</sup>              |
|------|---------|--------------------------------|-----------------------------|------------------------------------|
|      |         | (ng/1 x 10 <sup>6</sup> cells) |                             | (ng/1 x 10 <sup>6</sup> cells)     |
| 1    | (-) NGF | 23.4                           | 2.18                        | - <sup>d</sup>                     |
|      | (+) NGF | 62.3                           | 2.41 (2.7) <sup>e, **</sup> | -                                  |
| 2    | (-) NGF | 360.5                          | 6.97                        | -                                  |
|      | (+) NGF | 736.7                          | 9.38 (2.0) <sup>*</sup>     | -                                  |
| 3    | (-) NGF | 632.5                          | 21.53                       | 198.9 ± 18.91                      |
|      | (+) NGF | 986.3                          | 40.41 (1.6) <sup>*</sup>    | 344.2 ± 23.99 (1.7) <sup>*</sup>   |
| 4    | (-) NGF | 652.7                          | 5.54                        | 225.5 ± 28.90                      |
|      | (+) NGF | 1019.2                         | 33.05 (1.6) <sup>*</sup>    | 351.9 ± 16.06 (1.6) <sup>*</sup>   |
| 5    | (-) NGF | 662.9                          | 5.82                        | 252.2 ± 25.77                      |
|      | (+) NGF | 1060.8                         | 20.20 (1.6) <sup>*</sup>    | 410.9 ± 10.22 (1.6) <sup>d,*</sup> |

<sup>a</sup>BMMCs (1 x 10<sup>6</sup> cells) cultured in absence or presence of 10 ng/ml NGF were lysed with 0.4% triton X-100 at each week culture as described in “Materials and Methods”. Total histamine contents were analyzed using an automated fluorometer analyzer, and tryptase using ELISA method. <sup>b</sup>BMMCs cultured with WEHI-3B media. <sup>c</sup>BMMCs cultured with media containing hrIL-3. <sup>d</sup>no detection. <sup>e</sup>Parentheses represent an increased ratio by NGF treatment. Total histamine contents for BMMCs cultured with hrIL-3 media were checked, but not shown to avoid complexity because they were gradually increased in the same way as tryptase and TNF- contents. <sup>\*</sup>*P*<0.05; <sup>\*\*</sup>*P*<0.01 compared with (-) NGF. (-)NGF or (+) NGF, cells cultured without or with NGF (10 ng/ml), respectively.

**Online supplement Table 5.** Effects of transfections or inhibitors on total histamine and tryptase contents in NGF-cultured HMC-1 cells<sup>a</sup>.

|                         | Total histamine<br>(ng/1 x 10 <sup>6</sup> cells) |                             | Total tryptase<br>(ng/1 x 10 <sup>6</sup> cells) |
|-------------------------|---------------------------------------------------|-----------------------------|--------------------------------------------------|
| NGF                     | 453.5                                             | 10.34 [39.4] <sup>b</sup>   | 204.2 ± 10.59 [34.2] <sup>b</sup>                |
| Pyruvate kinase         | 263.0                                             | 6.23 (42.0) <sup>c,**</sup> | 143.6 ± 8.49 (29.7) <sup>**</sup>                |
| Annexin I siRNA         | 249.4                                             | 5.91 (45.0) <sup>**</sup>   | 147.8 ± 15.64 (27.6) <sup>**</sup>               |
| co-transfection         | 185.1                                             | 4.40 (59.2) <sup>***</sup>  | 125.1 ± 14.40 (38.7) <sup>**</sup>               |
| PD98059 (μM)            |                                                   |                             |                                                  |
| 1                       | 443.4                                             | 8.2 (2.4)                   | 199.0 ± 13.75 (2.5)                              |
| 10                      | 387.7                                             | 1.42 (14.5) <sup>*</sup>    | 174.6 ± 9.67 (14.5) <sup>*</sup>                 |
| 100                     | 210.0                                             | 4.57 (53.7) <sup>**</sup>   | 144.5 ± 12.87 (29.2) <sup>**</sup>               |
| K252a (nM) <sup>d</sup> |                                                   |                             |                                                  |
| 10                      | 417.1                                             | 10.58 (1.5)                 | 200.5 ± 10.58 (1.8)                              |
| 50                      | 403.6                                             | 9.56 (11.0)                 | 184.9 ± 17.02 (9.5)                              |
| 100                     | 340.6                                             | 5.00 (24.9) <sup>*</sup>    | 161.9 ± 13.54 (20.7) <sup>*</sup>                |
| LY294002 (μM)           |                                                   |                             |                                                  |
| 100                     | 448.1                                             | 20.42 (1.2)                 | 203.2 ± 22.23 (0.5)                              |
| 300                     | 447.2                                             | 13.46 (1.4)                 | 200.4 ± 10.54 (1.8)                              |
| Wortmannin (nM)         |                                                   |                             |                                                  |
| 5                       | 422.3                                             | 17.23 (3.0)                 | 203.5 ± 6.29 (0.3)                               |
| 10                      | 431.8                                             | 24.40 (1.2)                 | 201.1 ± 22.10 (2.0)                              |

<sup>a</sup>HMC-1 cells or transfected HMC-1 cells ( $1 \times 10^6$ ) were cultured with NGF in WEHI-3B conditioned media for 10 days as described in “Materials and Methods”. Each inhibitor (K252a, PD98059, LY294002 or wortmannin) was added in HMC-1 cells 1 hr before NGF treatment. Histamine or tryptase levels were determined using an automated fluorometer analyzer and ELISA, respectively (N = 6). <sup>b</sup>A square bracket represents increased percentage, compared to control media ( $325.3 \pm 33.54$  ng/ $1 \times 10^6$  cells for histamine;  $152.2 \pm 11.77$  ng/ml for tryptase). <sup>c</sup>Parentheses represent decreased percentage, compared to NGF-cultured cells. <sup>d</sup>K252a could not use higher concentration than 100 nM because K252a induces apoptosis. Histamine and tryptase releases in non-relevant siRNA with NGF was  $458.2 \pm 5.35$  ng/ $1 \times 10^6$  cells and  $211.3 \pm 15.42$  ng/ $1 \times 10^6$  cells, respectively. \* $P < 0.05$ ; \*\* $P < 0.01$ ; \*\*\* $P < 0.001$  compared with NGF treatment.
