# Supplementary material
Source: publisher figshare collection journal article supplement (https://karger.figshare.com/articles/dataset/_/5120392)
Supplement: Supplementary file 2 [file 1]

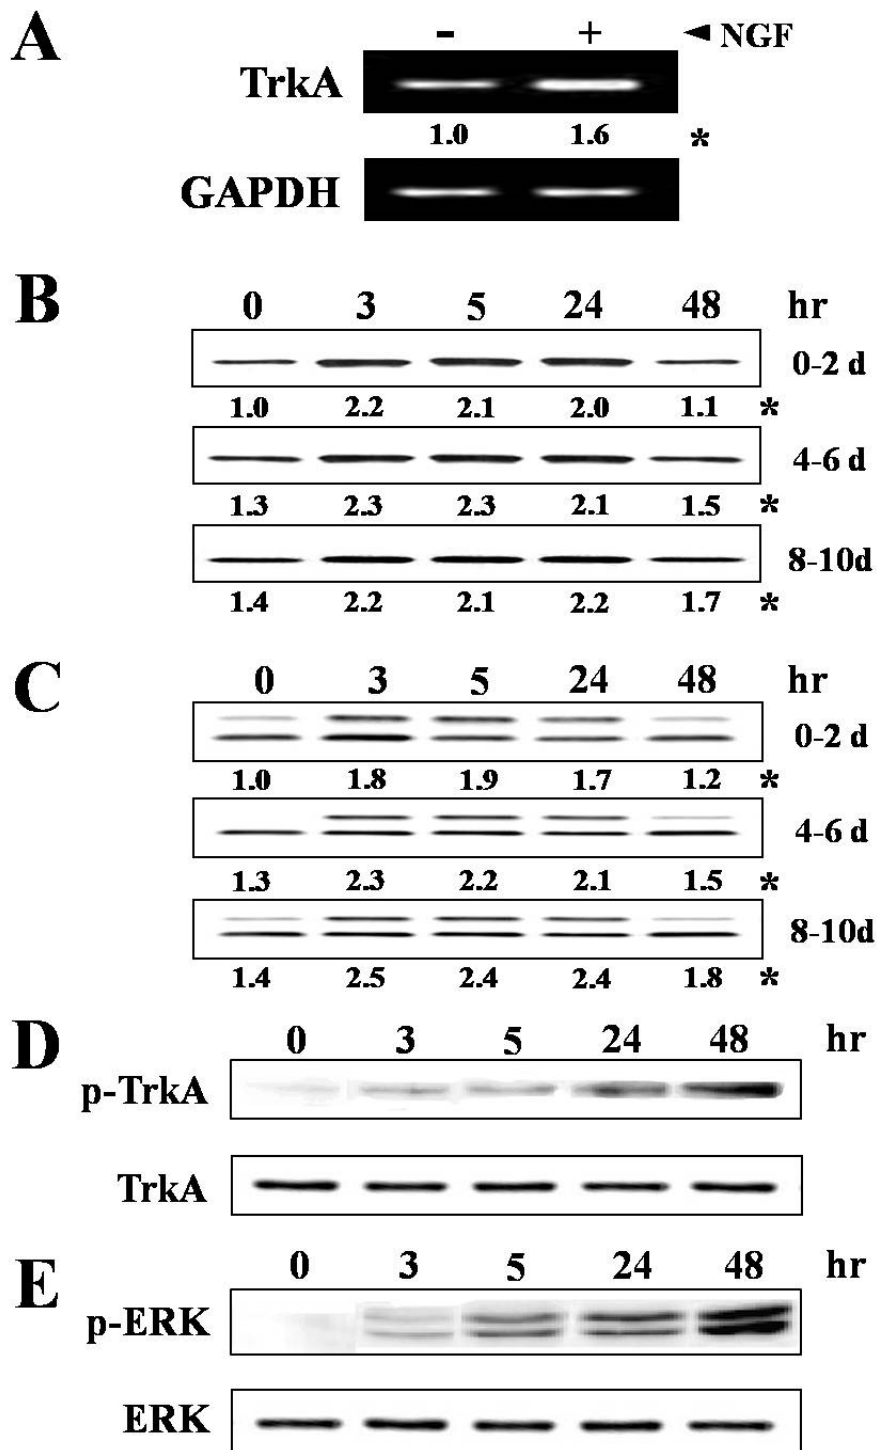

**Online supplement Fig. 3.** Kinetics of the activations of TrkA and ERK in NGF-cultured HMC-1 cells or NGF-cultured BMMCs. NGF-cultured HMC-1 cells ( $1 \times 10^6$  cells) or BMMCs ( $1 \times 10^6$  cells) were sampled at in the indicated time as described in “Materials and Methods”. Total mRNAs from HMC-1 cells were extracted and RT-PCR was performed using gene specific primers for TrkA (A). GAPDH was used as an internal control. (-) or (+), cells cultured without or with NGF, respectively. Western blot analysis of cell lysates against phosphorylated TrkA was conducted at the indicated times for HMC-1 cells (B) or for BMMCs (D). Western blot analysis of cell lysates against phosphorylated ERK for HMC-1 cells (C) or for BMMCs (E). \*, Relative intensity versus the control media. d, days. Experiments were performed in blocks of four.
