# Supplementary material
Source: publisher figshare collection journal article supplement (https://karger.figshare.com/articles/dataset/_/5120392)
Supplement: Supplementary file 3 [file 1]

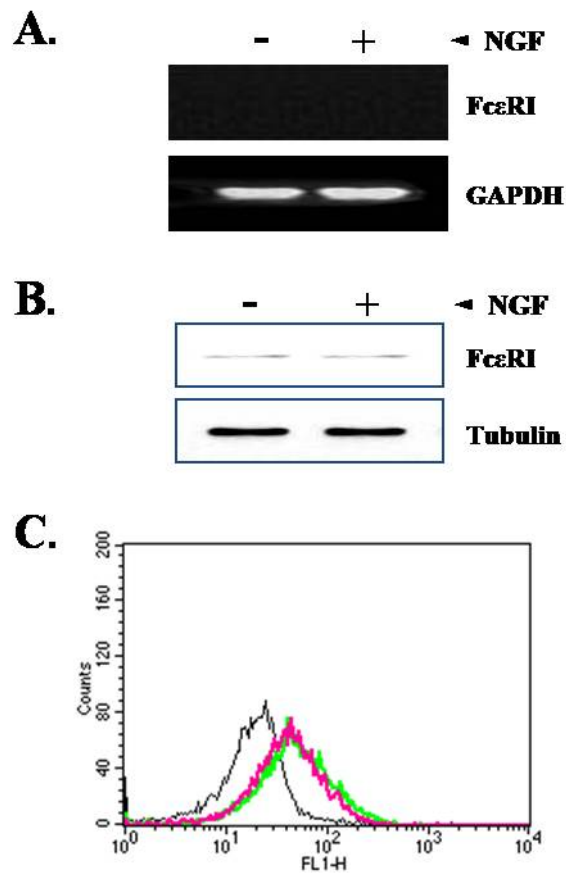

**Online supplement Fig. 1.** Expressions of Fc RI in NGF-cultured mast cells. NGF-cultured HMC-1 cells ( $1 \times 10^6$  cells) were sampled as described in “Materials and Methods”. Total mRNAs from HMC-1 cells were extracted and RT-PCR was performed using gene specific primers for Fc RI (A). Expression of Fc RI was conducted by western blot (B). (-) or (+), cells cultured without or with NGF, respectively. BMMCs ( $1 \times 10^6$  cells/ml) cultured in the presence or absence NGF (10 ng/ml) for 5 weeks were incubated with 0.1  $\mu$ g/ml anti-DNP IgE antibody in FACS buffer (PBS containing 5% FBS, 0.1% sodium azide) for 2 hr at 4 C. The cells were washed and stimulated with 1.0  $\mu$ g/ml FITC-conjugated anti-mouse IgE for 30 min at 4 C, and then analyzed by FACS as described in “Materials and Methods” (C). Black line, negative control; Red line, BMMCs cultured without NGF; Green line, BMMCs cultured with NGF.
