# Supplementary material
Source: publisher figshare collection journal article supplement (https://karger.figshare.com/articles/dataset/_/5120392)
Supplement: Supplementary file 4 [file 1]

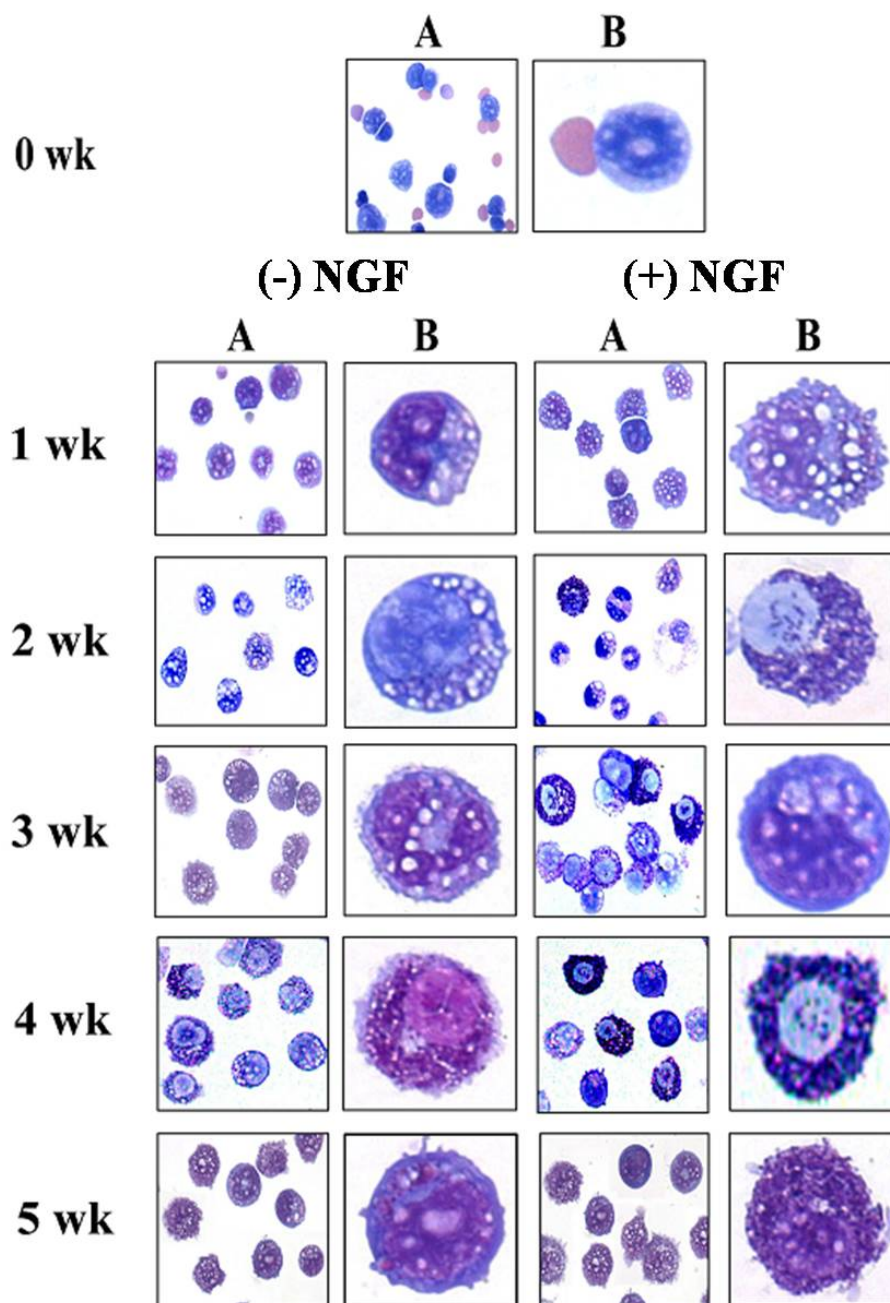

**Online supplement Fig. 2.** Morphology and phenotype of mouse bone marrow-derived mast cells (BMMCs). Bone marrow cells ( $5 \times 10^4$  cells) were flushed from femurs and tibias from BALB/c mice and were cultured in the presence of WEHI-3B-conditioned medium as described in “Materials and Methods”. Cytospin slides were prepared at the period indicated and were stained by May Grunwald-Giemsa. (-) NGF or (+) NGF, cells cultured without or with NGF (10 ng/ml), respectively. wk, week. A, several cells in the same field; B, single BMMCs alone. Experiments were performed in blocks of three.
