# Supplementary material
Source: publisher figshare collection journal article supplement (https://karger.figshare.com/articles/dataset/_/5120392)
Supplement: Supplementary file 5 [file 1]

Archive with 4 entries (4 files):
- Suppl Fig 1.pdf
- Suppl Fig 2.pdf
- Suppl Fig 3.pdf
- Suppl Table1-5.pdf
